# Supplementary material for: Highly porous core–shell chitosan beads with superb immobilization efficiency forLactobacillus reuteri121 inulosucrase and production of inulin-type fructooligosaccharides
Source: Royal Society of Chemistry journal article supplement (doi:10.1039/c8ra02241k), 2018-01-01
Supplement: c8ra02241k1.pdf [file c8ra02241k1.pdf]

## Supplementary Information

### Highly porous core-shell chitosan beads with superb immobilization efficiency for *Lactobacillus reuteri* 121 inulosucrase and production of inulin-type fructooligosaccharides

Thanapon Charoenwongpaiboon, Karan Wangpaiboon, Rath Pichyangkura, Manchumas Hengsakul Prousoontorn\*

Department of Biochemistry, Faculty of Science, Chulalongkorn University, Bangkok, Thailand

\*Correspondence: Dr. Manchumas hengsakul Prousoontorn, Department of Biochemistry, Faculty of Science, Chulalongkorn University, Phayathai Rd, Bangkok 10330, Thailand

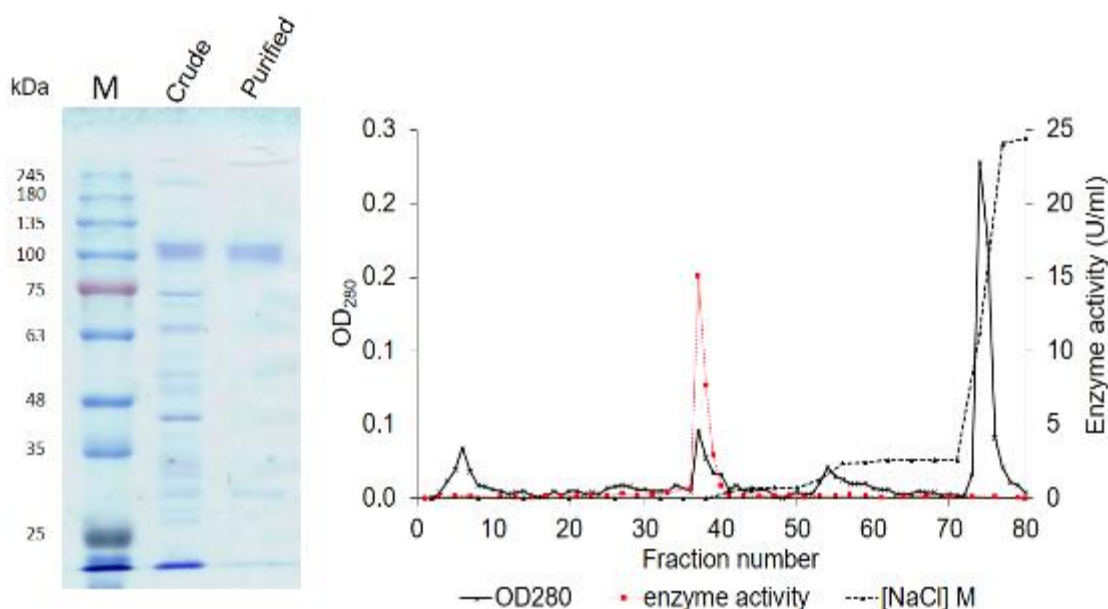

**Fig. S1** Inulosucrase purification profile by DEAE toyopearl chromatography.

**Table S1** Inulosucrase purification data.

| step           | Volume (ml) | Protein (mg) | Activity (U)       | Specific activity (U/mg) | Purification (fold) | Yield (%) |
|----------------|-------------|--------------|--------------------|--------------------------|---------------------|-----------|
| Crude          | 20          | 18.3         | $1.23 \times 10^3$ | 67.0                     | 1                   | 100       |
| DEAE-toyopearl | 23          | 2.22         | 587                | 264                      | 3.94                | 49        |

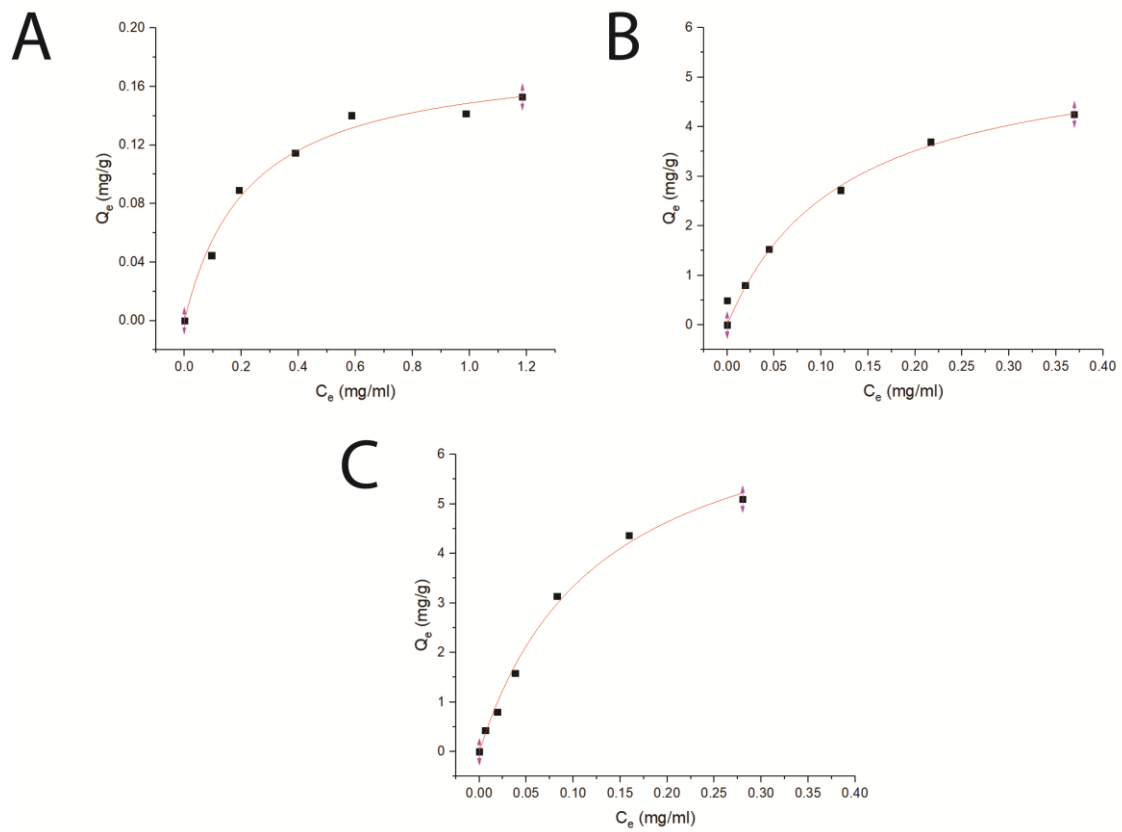

**Fig. S2** BSA isotherm on DBs (A), HGBs (B) and CSBs (C) of the Langmuir model.

**Table S2** Diameter of CSBs and DBs.

| CSBs diameter (mm) |       |      |       | Shell/Core ratio | DBs diameter (mm) |       |
|--------------------|-------|------|-------|------------------|-------------------|-------|
| No.                | Total | Core | Shell |                  | No.               | Total |
| 1                  | 1.19  | 1.08 | 0.11  | 0.10             | 1                 | 1.43  |
| 2                  | 1.30  | 1.21 | 0.09  | 0.07             | 2                 | 1.23  |
| 3                  | 1.27  | 1.14 | 0.13  | 0.11             | 3                 | 1.30  |
| 4                  | 1.43  | 1.31 | 0.13  | 0.10             | 4                 | 1.17  |
| 5                  | 1.12  | 1.01 | 0.11  | 0.11             | 5                 | 1.35  |
| 6                  | 1.34  | 1.21 | 0.13  | 0.11             | 6                 | 1.25  |
| 7                  | 1.16  | 1.09 | 0.07  | 0.06             | 7                 | 0.01  |
| 8                  | 1.15  | 1.06 | 0.09  | 0.09             | 8                 | 1.12  |
| 9                  | 1.36  | 1.26 | 0.10  | 0.08             | 9                 | 1.38  |
| 10                 | 1.35  | 1.25 | 0.10  | 0.08             | 10                | 1.32  |
| 11                 | 1.19  | 1.12 | 0.07  | 0.06             | 11                | 1.23  |
| 12                 | 1.17  | 1.07 | 0.11  | 0.10             | 12                | 1.42  |
| 13                 | 1.24  | 1.14 | 0.10  | 0.09             | 13                | 1.21  |
| 14                 | 1.31  | 1.19 | 0.12  | 0.10             | 14                | 1.37  |
| 15                 | 1.29  | 1.18 | 0.11  | 0.09             | 15                | 1.19  |
| 16                 | 1.40  | 1.30 | 0.10  | 0.08             | 16                | 1.50  |
| 17                 | 1.20  | 1.09 | 0.12  | 0.11             | 17                | 1.35  |
| 18                 | 1.15  | 1.10 | 0.05  | 0.05             | 18                | 1.20  |
| 19                 | 1.29  | 1.20 | 0.09  | 0.08             | 19                | 1.24  |
| 20                 | 1.17  | 1.10 | 0.08  | 0.07             | 20                | 1.07  |
| 21                 | 1.26  | 1.17 | 0.08  | 0.07             | 21                | 1.21  |
| 22                 | 1.27  | 1.17 | 0.10  | 0.08             | 22                | 1.36  |
| 23                 | 1.11  | 1.04 | 0.07  | 0.07             | 23                | 1.41  |
| 24                 | 1.21  | 1.13 | 0.09  | 0.08             | 24                | 0.97  |
| 25                 | 1.12  | 1.02 | 0.10  | 0.10             | 25                | 1.33  |
| 26                 | 1.47  | 1.34 | 0.13  | 0.10             | 26                | 1.39  |
| 27                 | 1.30  | 1.18 | 0.12  | 0.10             | 27                | 1.40  |
| 28                 | 1.40  | 1.27 | 0.13  | 0.10             | 28                | 1.28  |
| 29                 | 1.07  | 0.99 | 0.08  | 0.08             | 29                | 1.39  |
| 30                 | 1.32  | 1.22 | 0.11  | 0.09             | 30                | 1.28  |
| 31                 | 1.14  | 1.05 | 0.09  | 0.08             | 31                | 1.17  |
| 32                 | 1.54  | 1.35 | 0.19  | 0.14             | 32                | 1.17  |
| 33                 | 1.19  | 1.09 | 0.10  | 0.09             | 33                | 1.34  |
| 34                 | 1.36  | 1.20 | 0.16  | 0.14             | 34                | 1.30  |
| 35                 | 1.24  | 1.08 | 0.16  | 0.15             | 35                | 1.35  |
| Mean               | 1.26  | 1.15 | 0.11  | 0.09             | Mean              | 1.25  |
| SD                 | 0.11  | 0.10 | 0.03  | 0.02             | SD                | 0.24  |

A

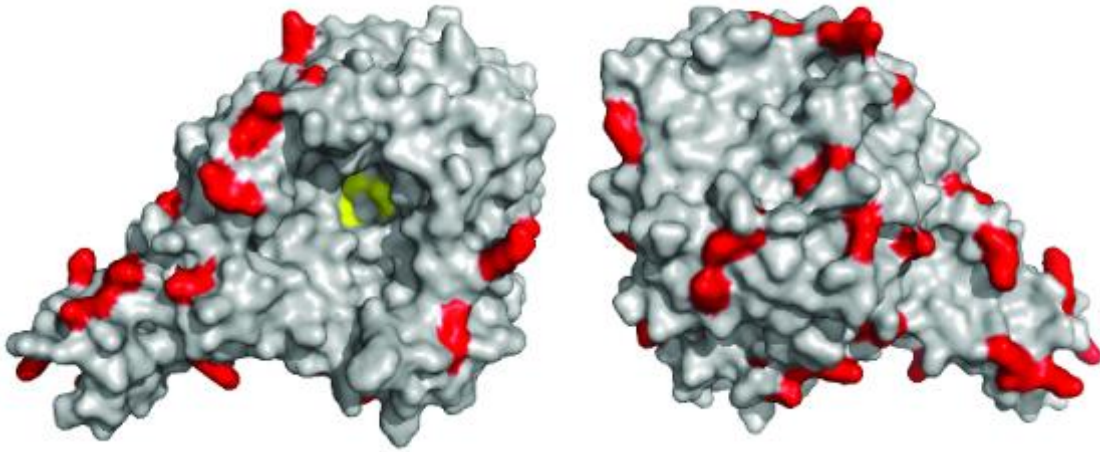

B

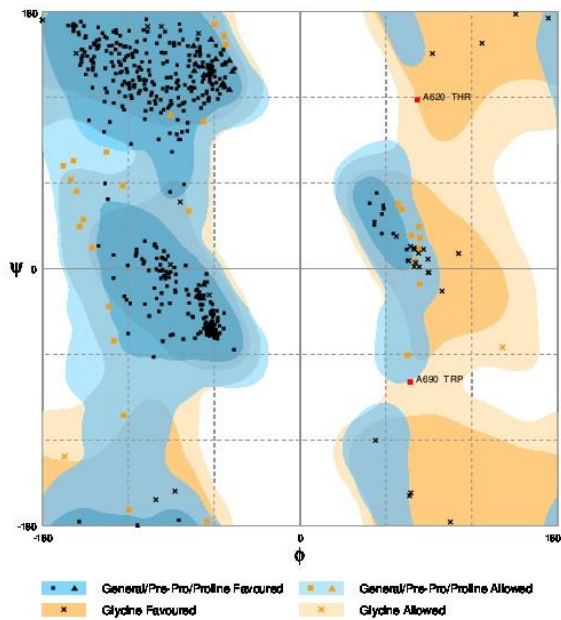

**Fig. S3** (A) Homology modeling of inulosucrase of *Lactobacillus reuteri* 121 by means of Swissmodel [1-5], using the 3D structure of inulosucrase from *Lactobacillus johnsonii* NCC 533 (Protein Data Bank [PDB] ID: 2YFR, 73% identity) as a template. On the left is a frontal view, and on the right is the posterior view of protein; Lys residues are red, and three catalytic residues are yellow. (B) Ramachandran Plot for homology modeling of Inu calculated by RAMPAGE server (<http://mordred.bioc.cam.ac.uk/~rapper/rampage.php>) [6].

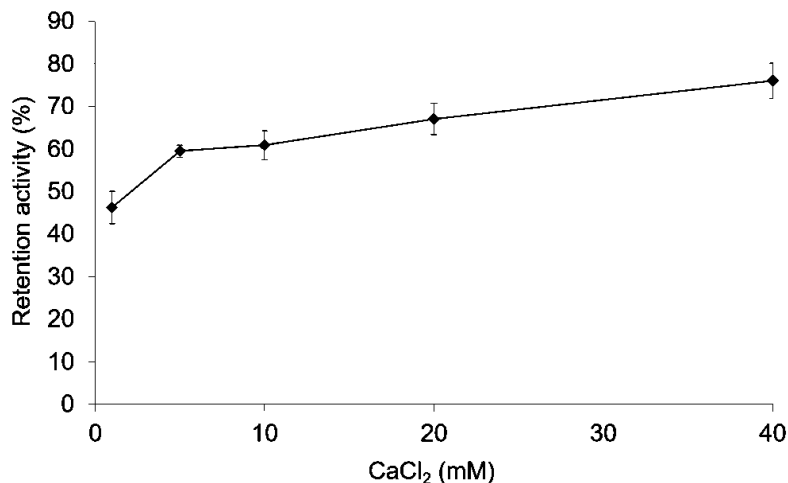

**Fig. S4** Effect of CaCl<sub>2</sub> concentration on INU-CSBs stability.

## Reference

1. Bienert, S., et al., *The SWISS-MODEL Repository—new features and functionality*. Nucleic Acids Research, 2017. **45**(Database issue): p. D313-D319.
2. Benkert, P., M. Biasini, and T. Schwede, *Toward the estimation of the absolute quality of individual protein structure models*. Bioinformatics, 2011. **27**(3): p. 343-350.
3. Guex, N., M.C. Peitsch, and T. Schwede, *Automated comparative protein structure modeling with SWISS-MODEL and Swiss-PdbViewer: A historical perspective*. ELECTROPHORESIS, 2009. **30**(S1): p. S162-S173.
4. Biasini, M., et al., *SWISS-MODEL: modelling protein tertiary and quaternary structure using evolutionary information*. Nucleic Acids Research, 2014. **42**(W1): p. W252-W258.
5. Bertoni, M., et al., *Modeling protein quaternary structure of homo- and hetero-oligomers beyond binary interactions by homology*. Scientific Reports, 2017. **7**: p. 10480.
6. Lovell, S.C., et al., *Structure validation by  $\alpha$  geometry:  $\phi$ ,  $\psi$  and  $C\beta$  deviation*. Proteins: Structure, Function, and Bioinformatics, 2003. **50**(3): p. 437-450.
